# Supplementary material for: Efficacy and safety of boosted darunavir-based antiretroviral therapy in HIV-1-positive patients: results from a meta-analysis of clinical trials
Source: PubMed Central journal article supplement (PMC5869729; doi:10.1038/s41598-018-23375-6), 2018-03-27
Supplement: 41598_2018_23375_MOESM1_ESM.pdf [file 41598_2018_23375_MOESM1_ESM.pdf]

## **Efficacy and safety of boosted darunavir-based antiretroviral therapy in HIV-1-positive patients: results from a meta-analysis of clinical trials**

**Antinori A<sup>1</sup>, Lazzarin A<sup>2</sup>, Uglietti A<sup>3</sup>, Palma M<sup>3</sup>, Mancusi D<sup>3\*</sup> and Termini R<sup>3</sup>**

1. HIV/AIDS Department, National Institute for Infectious Diseases “Lazzaro Spallanzani” IRCCS, Roma, Italy
  2. Infectious Diseases, San Raffaele Scientific Institute, Milano, Italy
  3. Janssen-Cilag SpA, Medical Affairs Department, Infectious Diseases, Cologno Monzese (MI), Italy
- \*dmancusi@its.jnj.com

**Supplementary Figure 1 – Risk of bias for the included studies**

|                        | Random sequence generation (selection bias) | Allocation concealment (selection bias) | Blinding of participants and personnel (performance bias) | Blinding of outcome assessment (detection bias) | Incomplete outcome data (attrition bias) | Selective reporting (reporting bias) | Other bias |
|------------------------|---------------------------------------------|-----------------------------------------|-----------------------------------------------------------|-------------------------------------------------|------------------------------------------|--------------------------------------|------------|
| Aberg JA et al, 2012   | +                                           | +                                       | -                                                         | -                                               |                                          | +                                    | -          |
| Antinori A et al, 2015 | +                                           | +                                       | -                                                         | -                                               | +                                        | +                                    | +          |
| Aribas JR et al, 2010  | +                                           | +                                       | -                                                         | -                                               | +                                        | +                                    | +          |
| Banhegyi D et al, 2012 | +                                           | +                                       | -                                                         | -                                               | +                                        | +                                    | +          |
| Cahn P et al, 2011     | +                                           | +                                       | -                                                         | -                                               |                                          | +                                    | +          |
| Chéret A et al, 2015   | +                                           | +                                       | -                                                         | -                                               | +                                        | +                                    |            |
| Clotet B et al, 2014   | +                                           | +                                       | -                                                         | -                                               | +                                        | +                                    | -          |
| Clotet et al, 2007     | +                                           | +                                       | -                                                         | -                                               | +                                        | +                                    | +          |
| Gianotti N et al, 2016 | +                                           | +                                       | -                                                         | -                                               | +                                        | +                                    |            |
| Girard PM et al, 2017  | +                                           | +                                       | -                                                         | -                                               | +                                        | +                                    | +          |
| Guaraldi G et al, 2014 | +                                           | +                                       | -                                                         | -                                               | +                                        | +                                    |            |
| Hamzah L et al, 2015   | +                                           | +                                       | -                                                         | -                                               |                                          | +                                    |            |
| Huhn GD et al, 2015    | +                                           | +                                       | -                                                         | -                                               | +                                        | +                                    | -          |
| Katlama C et al, 2010  | +                                           | +                                       | -                                                         | -                                               | +                                        | +                                    | +          |
| Lennox JL et al, 2014  | +                                           | +                                       | -                                                         | -                                               | +                                        | +                                    | +          |
| Madrugá JV et al, 2007 | +                                           | +                                       | -                                                         | -                                               | +                                        | +                                    | +          |
| Maggiolo F et al, 2016 | +                                           | +                                       | -                                                         | -                                               | +                                        | +                                    | +          |
| Martinez E et al, 2014 | +                                           | +                                       | -                                                         | -                                               |                                          | +                                    |            |
| Mills AM et al, 2009   | +                                           | +                                       | -                                                         | -                                               | +                                        | +                                    | +          |
| Molina JM et al, 2015  | +                                           | +                                       | -                                                         | -                                               | +                                        | +                                    | -          |
| Moltó J et al, 2015    | +                                           | +                                       | -                                                         | -                                               |                                          | +                                    |            |
| Nishijima et al 2013   | +                                           | +                                       | -                                                         | -                                               |                                          | +                                    |            |
| Ortiz R et al, 2008    | +                                           | +                                       | -                                                         | -                                               | +                                        | +                                    | +          |
| Santos JR et al, 2016  | +                                           | +                                       | -                                                         | -                                               | +                                        | +                                    | +          |
| Slama L et al, 2016    | +                                           | +                                       | -                                                         | -                                               |                                          | +                                    |            |

**Legend:**

Green = Low risk

Red = High risk

Empty cell = Unclear risk
